# Supplementary material
Source: PubMed Central journal article supplement (PMC3031385)
Supplement: blood-2010-02-269696_1.pdf [file blood-2010-02-269696_1.pdf]

| Patient # | PB Granulocytes<br>JAK2V617F<br>Allele Burden (%) | Experiment*       | Patient # | PB Granulocytes<br>JAK2V617F<br>Allele Burden (%) | Experiment     |
|-----------|---------------------------------------------------|-------------------|-----------|---------------------------------------------------|----------------|
| 1         | 80                                                | a, c,d, g         | 17        | 70                                                | h              |
| 2         | 60                                                | j                 | 18        | 89                                                | m              |
| 3         | 35                                                | a, c, d,g         | 19        | 0                                                 | a,j            |
| 4         | 86                                                | k,l               | 20        | 0                                                 | a,c            |
| 5         | 45                                                | a,c               | 21        | 0                                                 | a,c            |
| 6         | 77                                                | a, c,d,g, j, k, l | 22        | 0                                                 | a,c            |
| 7         | 35                                                | a                 | 23        | 0                                                 | j.m            |
| 8         | 10                                                | a                 | 24        | 0                                                 | a,c,e          |
| 9         | 75                                                | a, c, d,k,l       | 25        | 0                                                 | a, b           |
| 10        | 70                                                | k, l              | 26        | 0                                                 | a, b           |
| 11        | 80                                                | a, e,f            | 27        | 0                                                 | a, b, c, e,j,m |
| 12        | 37                                                | a, c, d,e, f,g    | 28        | 0                                                 | a, b, c, e,j,m |
| 13        | 65                                                | a,b, c, d,e, f    | 29        | 0                                                 | a, c           |
| 14        | 65                                                | a, e,f            | 30        | 0                                                 | h,m            |
| 15        | 70                                                | h                 | 31        | 0                                                 | h.m            |
| 16        | 74                                                | h                 | 32        | 0                                                 | a, b, c,i      |

\***a**: Phenotype of CD34+ cells treated with 5azaD/SAHA; **b**: Apoptosis of CD34+ cells treated with 5azaD/SAHA  
**c**: HPC assay of CD34+ cells treated with 5azaD/SAHA; **d**:JAK2V617F of HPC assayed from CD34+ cells treated with 5azaD/SAHA  
**e**: Migration assay of CD34+ cells treated with 5azaD/SAHA; **f**:JAK2V617F of migrating cells  
**g**: SRC assay of CD34+ cells treated with 5azaD/SAHA; **h**: Phenotype of CD34+ cells treated with JAK Inhibitor 1, AZ1480, Hydroxyurea or Peg-IFN- $\alpha$ 2a  
**i**: chromosomal abnormality of HPC treated with 5azaD/SAHA; **j**: CD34+ cells treated with SAHA alone  
**k**: SRC assay of CD34+ cells treated with 5azaD/TSA; **l**: Phenotype of CD34+ cells treated with 5azaD/TSA  
**m**:CD34+ cells treated with 5azaD alone
